# Supplementary material for: Systematic Review: HIV, Aging, and Housing—A North American Perspective, 2012–2023
Source: MDPI journal article supplement (doi:10.3390/healthcare12100992), 2024-05-11
Supplement: s1 [file s1]

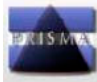

# PRISMA Checklist\_ Systematic Review: HIV, Aging, and Housing – North American Perspective 2012-2023

|                      | Item # | Checklist item                                                                                                                                                                                                                                                                                                                                                                                                                                                                                                                                                                                                                                                                                                                                                                                                                                                                                                                                                                                                                                                                                                                                                                                                                                                                                                                                                                                                                                                                                                                                                                                                                                                                                                                                                                                                                                                                                                                                                                                                                                            | Page location where item is reported |
|----------------------|--------|-----------------------------------------------------------------------------------------------------------------------------------------------------------------------------------------------------------------------------------------------------------------------------------------------------------------------------------------------------------------------------------------------------------------------------------------------------------------------------------------------------------------------------------------------------------------------------------------------------------------------------------------------------------------------------------------------------------------------------------------------------------------------------------------------------------------------------------------------------------------------------------------------------------------------------------------------------------------------------------------------------------------------------------------------------------------------------------------------------------------------------------------------------------------------------------------------------------------------------------------------------------------------------------------------------------------------------------------------------------------------------------------------------------------------------------------------------------------------------------------------------------------------------------------------------------------------------------------------------------------------------------------------------------------------------------------------------------------------------------------------------------------------------------------------------------------------------------------------------------------------------------------------------------------------------------------------------------------------------------------------------------------------------------------------------------|--------------------------------------|
| <b>TITLE</b>         |        |                                                                                                                                                                                                                                                                                                                                                                                                                                                                                                                                                                                                                                                                                                                                                                                                                                                                                                                                                                                                                                                                                                                                                                                                                                                                                                                                                                                                                                                                                                                                                                                                                                                                                                                                                                                                                                                                                                                                                                                                                                                           |                                      |
| Title                | 1      | <b>Systematic Review: HIV, Aging, and Housing - North American Perspective 2012-2023</b>                                                                                                                                                                                                                                                                                                                                                                                                                                                                                                                                                                                                                                                                                                                                                                                                                                                                                                                                                                                                                                                                                                                                                                                                                                                                                                                                                                                                                                                                                                                                                                                                                                                                                                                                                                                                                                                                                                                                                                  | 1                                    |
| <b>ABSTRACT</b>      |        |                                                                                                                                                                                                                                                                                                                                                                                                                                                                                                                                                                                                                                                                                                                                                                                                                                                                                                                                                                                                                                                                                                                                                                                                                                                                                                                                                                                                                                                                                                                                                                                                                                                                                                                                                                                                                                                                                                                                                                                                                                                           |                                      |
| Abstract             | 2      | <p>Advances in anti-retroviral therapy (ART) have decreased mortality rates and subsequently led to a rise in the number of HIV-positive people living longer. The housing experiences of this new population of interest - older adults (50 years and older) living with HIV are under-researched. Understanding the housing experiences and unmet needs of older HIV people can better provide comprehensive care services for them. This study's systematic review evaluated peer-reviewed literature reporting housing access/insecurity/assistance/options, housing impact, and unmet needs of older individuals living with HIV in North America from 2012 to 2023. Furthermore, Latent Semantic Analysis (LSA), a text-mining technique, and Singular Value Decomposition (SVD) for text clustering were utilized to examine unstructured data from the abstracts selected from the review. The goal allowed for a better understanding of the relationships between terms in the articles and the identification of emerging public health key themes affecting older adults living with HIV. The results of text clustering yielded two clusters focusing on 1). Improvements to housing and healthcare services access and policies. 2). Unmet needs - social support, mental health, finance, food, and sexuality insecurities. Topic modeling demonstrated four topics, which we themed to represent 1. Holistic Care Approach; 2. Insecurities - Food, financial, sexuality, and other basic needs; 3. Access to housing and treatment/care, and 4. Homelessness and HIV-related health outcomes. Stable housing, food, and healthcare services access and availability are critical elements to incorporating comprehensive, holistic healthcare for older adults living with HIV. This aging population needs high-priority policies that invest in equipping healthcare and supportive services that are accessible and equitable in the future.</p> <p><b>Keywords:</b> HIV, Older adults, Stigma, Sexuality, Housing, Homelessness.</p> | 1 & 2                                |
| <b>INTRODUCTION</b>  |        |                                                                                                                                                                                                                                                                                                                                                                                                                                                                                                                                                                                                                                                                                                                                                                                                                                                                                                                                                                                                                                                                                                                                                                                                                                                                                                                                                                                                                                                                                                                                                                                                                                                                                                                                                                                                                                                                                                                                                                                                                                                           |                                      |
| Rationale            | 3      | Prisma systematic review will be used to investigate the current knowledge of homelessness, housing access/insecurity/assistance/options, housing implications, and unmet needs of older people living with HIV/AIDS (PLWHA) in North America.                                                                                                                                                                                                                                                                                                                                                                                                                                                                                                                                                                                                                                                                                                                                                                                                                                                                                                                                                                                                                                                                                                                                                                                                                                                                                                                                                                                                                                                                                                                                                                                                                                                                                                                                                                                                            | 2-4                                  |
| Objectives           | 4      | My research questions will explore insights and themes that support knowledge synthesis from PRISMA to reflect the current evidence on social determinants of health and unfulfilled needs for older PLWHA. This study will aim to answer the questions: How does the stigma affect fair housing options (retirement/assisted living/other forms of housing)? How does sexuality correlate with housing access and maintenance? How important is housing as a health determinant for older PLWHA? Is the HIV/AIDS stigma and discrimination still an issue for older PLWHA?                                                                                                                                                                                                                                                                                                                                                                                                                                                                                                                                                                                                                                                                                                                                                                                                                                                                                                                                                                                                                                                                                                                                                                                                                                                                                                                                                                                                                                                                               | 2-4                                  |
| <b>METHODS</b>       |        |                                                                                                                                                                                                                                                                                                                                                                                                                                                                                                                                                                                                                                                                                                                                                                                                                                                                                                                                                                                                                                                                                                                                                                                                                                                                                                                                                                                                                                                                                                                                                                                                                                                                                                                                                                                                                                                                                                                                                                                                                                                           |                                      |
| Eligibility criteria | 5      | <p><b>Inclusion Criteria:</b> Date of publication - (January 2012 – 2023, 11 years), HIV diagnosis, the Language of publication – English, translation to English availability, type of articles includes full text/scholarly and peer-reviewed, study methodology – quantitative, qualitative (Interviews, focus groups, ethnography), mixed-method with at housing status and HIV/AIDS health outcome as a variable. Geographic location (s) - North America (USA and Canada), Age of subjects &gt;50yrs, Socioeconomic level (low SES)</p> <p><b>Exclusion Criteria:</b> Age of subjects &lt;18yrs/ &lt;50/65yrs, HIV status- negative, Socioeconomic level (High SES), Country – Not USA or Canada, Full articles not available, Language – not English/Translation not available, Date of publication - (&gt;11yrs), Type of publication – letters, editorials, non-peer-reviewed articles, dissertation/thesis, news and conference articles.</p>                                                                                                                                                                                                                                                                                                                                                                                                                                                                                                                                                                                                                                                                                                                                                                                                                                                                                                                                                                                                                                                                                                   | 5-6                                  |
| Information sources  | 6      | A search was conducted using EBSCO Host databases, and most articles were retrieved from MEDLINE, Academic Search Complete, APA PsycINFO, Health Source: Nursing/Academic Edition, and Psychology and Behavioral Sciences Collection. Last searched 4/2023.                                                                                                                                                                                                                                                                                                                                                                                                                                                                                                                                                                                                                                                                                                                                                                                                                                                                                                                                                                                                                                                                                                                                                                                                                                                                                                                                                                                                                                                                                                                                                                                                                                                                                                                                                                                               | 5                                    |
| Search strategy      | 7      | The Boolean phrase search criteria include the terms HIV or aids or acquired human immunodeficiency syndrome or human immunodeficiency                                                                                                                                                                                                                                                                                                                                                                                                                                                                                                                                                                                                                                                                                                                                                                                                                                                                                                                                                                                                                                                                                                                                                                                                                                                                                                                                                                                                                                                                                                                                                                                                                                                                                                                                                                                                                                                                                                                    | 5                                    |

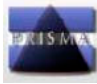

## PRISMA Checklist\_ Systematic Review: HIV, Aging, and Housing – North American Perspective 2012-2023

|                               | Item # | Checklist item                                                                                                                                                                                                                                                                                                                                                                                                                                                                                                                                                                                                                                                                                                 | Page location where item is reported |
|-------------------------------|--------|----------------------------------------------------------------------------------------------------------------------------------------------------------------------------------------------------------------------------------------------------------------------------------------------------------------------------------------------------------------------------------------------------------------------------------------------------------------------------------------------------------------------------------------------------------------------------------------------------------------------------------------------------------------------------------------------------------------|--------------------------------------|
|                               |        | virus AND elderly or aged or older or elder or geriatric AND housing or (retirement home) or (nursing homes) or (care homes) or (long-term care) or (residential care) or (aged care facility). Peer-reviewed articles from 2012 to 4/2023                                                                                                                                                                                                                                                                                                                                                                                                                                                                     |                                      |
| Selection process             | 8      | <p>Study selection was followed the process of identification (3172 articles), screening (1743 articles), eligibility (66 articles), and inclusion (23 articles).</p> <p>An initial screening involved removing duplicates and based on title and abstract we excluded irrelevant items from the comprehensive search, as 'false positives' are inevitable when designing a search for comprehensiveness rather than precision. We sought full-text 133 articles, more articles were excluded because no issues involving HIV, housing, no full text, and no English translation.</p> <p>Two reviewers independently screened each record and each report. No automation tools were used for this process.</p> | 6-7                                  |
| Data collection process       | 9      | <p>Study selection was followed the process of identification (3172 articles), screening (1743 articles), eligibility (66 articles), and inclusion (23 articles).</p> <p>An initial screening involved removing duplicates and based on title and abstract we excluded irrelevant items from the comprehensive search, as 'false positives' are inevitable when designing a search for comprehensiveness rather than precision. We sought full-text 133 articles, more articles were excluded because no issues involving HIV, housing, no full text, and no English translation.</p> <p>Two reviewers independently screened each record and each report. No automation tools were used for this process.</p> | 6-7                                  |
| Data items                    | 10a    | The outcomes include older adults' barriers to healthcare services and housing, critical support resources such as social support for both emotional (mental health) and functional needs, uncertainties associated with finance, food, and sexuality insecurities, and other unmet needs. The outcomes were compatible with each study and used SAS Enterprise Miner 15.2. Latent Semantic Analysis (LSA).                                                                                                                                                                                                                                                                                                    | 8-15                                 |
|                               | 10b    | No other data was sought, and no assumptions were made about any missing or unclear information.                                                                                                                                                                                                                                                                                                                                                                                                                                                                                                                                                                                                               | n/a                                  |
| Study risk of bias assessment | 11     | <p>Studies from other industrialized nations were not considered for this study; only studies from the USA and Canada were. We could have missed some insightful, pertinent, and educational articles based on empirical research reports inaccessible in commercially published literature because our gray literature searches were limited.</p> <p>Two reviewers independently assessed each study and no automation tools used.</p>                                                                                                                                                                                                                                                                        | 16                                   |
| Effect measures               | 12     | No effect measure was computed.                                                                                                                                                                                                                                                                                                                                                                                                                                                                                                                                                                                                                                                                                | n/a                                  |
| Synthesis methods             | 13a    | Latent Semantic Analysis (LSA) is a theory and technique that uses statistical calculations on a sizable corpus of text to extract and represent the meaning of words used in context. Topic extraction using LSA is used to efficiently analyze extensive study and identify common themes by identifying keywords within them. Also Singular Value Decomposition (SVD) (low SVD resolution and maximum cluster) was applied to cluster text and using 15 descriptive terms that fully represent each cluster from the selected 23 abstracts (dataset) from the systematic review.                                                                                                                            | 8-12                                 |
|                               | 13b    | A summative content analysis was used for data presentation or synthesis.                                                                                                                                                                                                                                                                                                                                                                                                                                                                                                                                                                                                                                      | 12                                   |
|                               | 13c    | A summative content analysis was used for data presentation or synthesis. Ones and zeros were put on the table to represent if the article discussed the title topics that emerged from the LSA. Percentage for each topic was calculated.                                                                                                                                                                                                                                                                                                                                                                                                                                                                     | 12                                   |
|                               | 13d    | No meta-analysis was performed                                                                                                                                                                                                                                                                                                                                                                                                                                                                                                                                                                                                                                                                                 | n/a                                  |
|                               | 13e    | No methods were used to explore possible causes of heterogeneity among study results (e.g., subgroup analysis, meta-regression).                                                                                                                                                                                                                                                                                                                                                                                                                                                                                                                                                                               | n/a                                  |



## PRISMA Checklist\_ Systematic Review: HIV, Aging, and Housing – North American Perspective 2012-2023

|                           | Item # | Checklist item                                                                                                                                                                                                                                                                                                                                                                                                                                                                                                                                                                                                                                                                                                 | Page location where item is reported |
|---------------------------|--------|----------------------------------------------------------------------------------------------------------------------------------------------------------------------------------------------------------------------------------------------------------------------------------------------------------------------------------------------------------------------------------------------------------------------------------------------------------------------------------------------------------------------------------------------------------------------------------------------------------------------------------------------------------------------------------------------------------------|--------------------------------------|
|                           | 13f    | No sensitivity analyses conducted to assess robustness of the synthesized results.                                                                                                                                                                                                                                                                                                                                                                                                                                                                                                                                                                                                                             | n/a                                  |
| Reporting bias assessment | 14     | No methods were used to assess risk of bias                                                                                                                                                                                                                                                                                                                                                                                                                                                                                                                                                                                                                                                                    | n/a                                  |
| Certainty assessment      | 15     | No methods are used to assess certainty (or confidence) in the body of evidence for an outcome.                                                                                                                                                                                                                                                                                                                                                                                                                                                                                                                                                                                                                | n/a                                  |
| <b>RESULTS</b>            |        |                                                                                                                                                                                                                                                                                                                                                                                                                                                                                                                                                                                                                                                                                                                |                                      |
| Study selection           | 16a    | <p>Study selection was followed the process of identification (3172 articles), screening (1743 articles), eligibility (66 articles), and inclusion (23 articles).</p> <p>An initial screening involved removing duplicates and based on title and abstract we excluded irrelevant items from the comprehensive search, as 'false positives' are inevitable when designing a search for comprehensiveness rather than precision. We sought full-text 133 articles, more articles were excluded because no issues involving HIV, housing, no full text, and no English translation.</p> <p>Two reviewers independently screened each record and each report. No automation tools were used for this process.</p> | 6-7                                  |



# PRISMA Checklist\_ Systematic Review: HIV, Aging, and Housing – North American Perspective 2012-2023

## Prisma Systematic Review flowchart

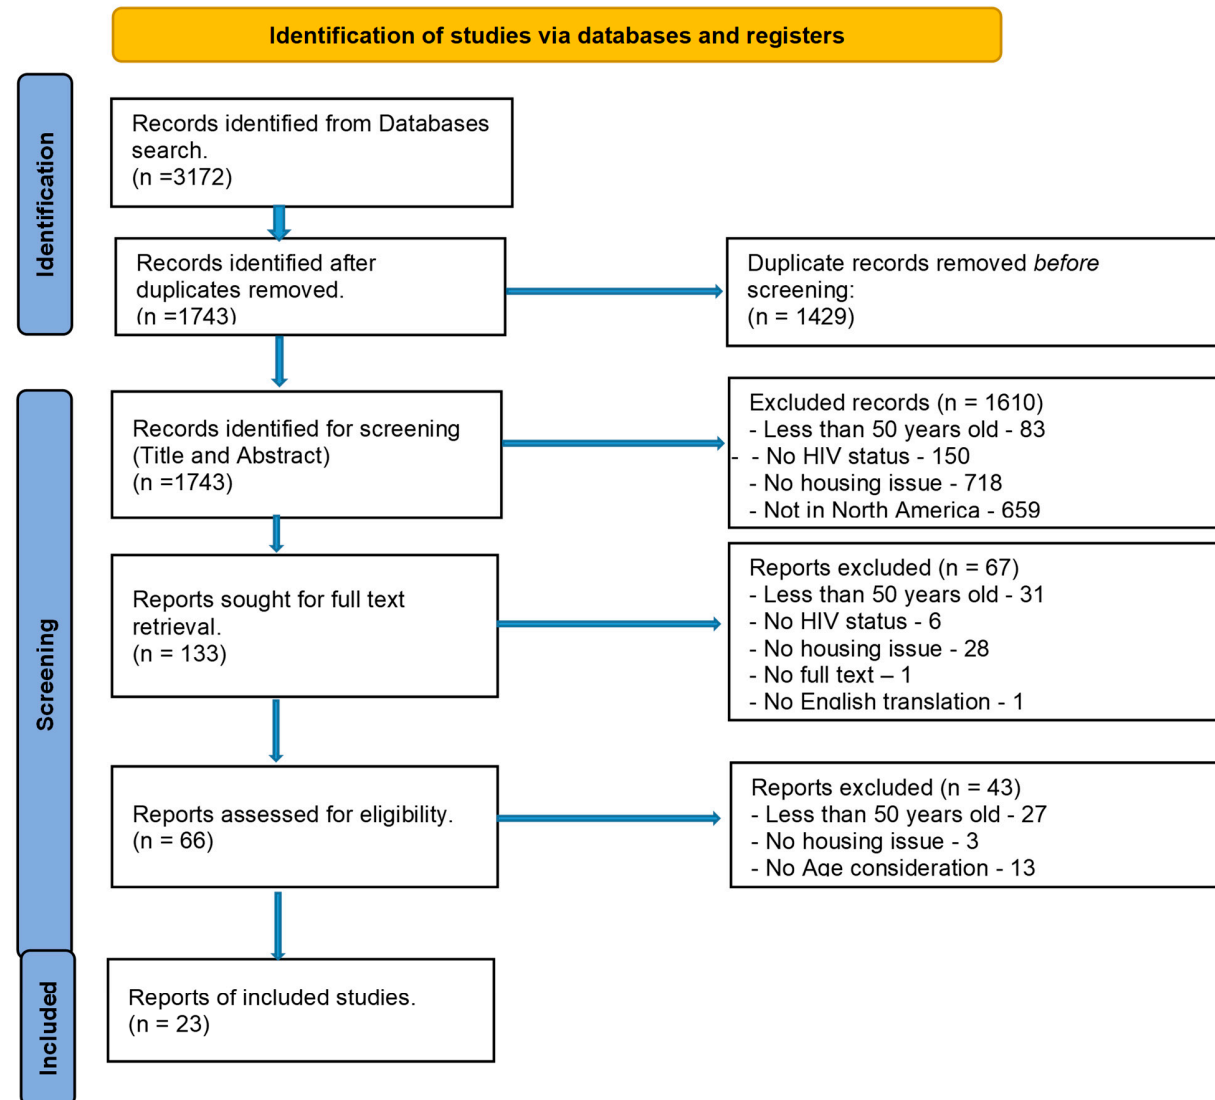

Results

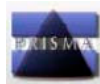

# PRISMA Checklist\_ Systematic Review: HIV, Aging, and Housing – North American Perspective 2012-2023

|                         | Item #                    | Checklist item                                                                                                                                                                                                                                                                                                                                                                                                                                                                                                                                                                                                                                                                                                                                                                                                                                                                                                                                                                                                                                                                                                                                                                                                                                                                                                                                                                                                                                                                                                                                                                                                                                                                                                                                                                                                                                                                                                                                                                                                                                                                                                                                                                                                                                                                                                                                                                                                                                                                                                                                                                                                                                                                                                                                                                                                                                                                                                                                                                                                                                                                                                                                                                                                                                                                                                                                                              | Page location where item is reported                                             |                                         |                                                                |                                                                                 |  |  |           |  |  |  |                                                                                  |  |  |                                                                                 |   |        |      |                                              |                                         |                                                                |                                                  |   |                       |        |   |   |   |   |   |                   |        |   |   |   |   |   |                      |        |   |   |   |   |   |                     |        |   |   |   |   |   |                           |        |   |   |   |   |   |                   |        |   |   |   |   |   |                    |        |   |   |   |   |   |                      |        |   |   |   |   |   |                  |        |   |   |   |   |    |                     |        |   |   |   |   |    |                     |        |   |   |   |   |    |                   |        |   |   |   |   |    |                         |        |   |   |   |   |    |                      |        |   |   |   |   |    |                         |        |   |   |   |   |    |                        |        |   |   |   |   |    |                      |        |   |   |   |   |    |                    |        |   |   |   |   |    |                     |        |   |   |   |   |    |                     |        |   |   |   |   |    |                        |        |   |   |   |   |    |                       |        |   |   |   |   |    |                        |        |   |   |   |   |       |  |  |    |    |    |    |             |  |  |    |    |    |    |    |
|-------------------------|---------------------------|-----------------------------------------------------------------------------------------------------------------------------------------------------------------------------------------------------------------------------------------------------------------------------------------------------------------------------------------------------------------------------------------------------------------------------------------------------------------------------------------------------------------------------------------------------------------------------------------------------------------------------------------------------------------------------------------------------------------------------------------------------------------------------------------------------------------------------------------------------------------------------------------------------------------------------------------------------------------------------------------------------------------------------------------------------------------------------------------------------------------------------------------------------------------------------------------------------------------------------------------------------------------------------------------------------------------------------------------------------------------------------------------------------------------------------------------------------------------------------------------------------------------------------------------------------------------------------------------------------------------------------------------------------------------------------------------------------------------------------------------------------------------------------------------------------------------------------------------------------------------------------------------------------------------------------------------------------------------------------------------------------------------------------------------------------------------------------------------------------------------------------------------------------------------------------------------------------------------------------------------------------------------------------------------------------------------------------------------------------------------------------------------------------------------------------------------------------------------------------------------------------------------------------------------------------------------------------------------------------------------------------------------------------------------------------------------------------------------------------------------------------------------------------------------------------------------------------------------------------------------------------------------------------------------------------------------------------------------------------------------------------------------------------------------------------------------------------------------------------------------------------------------------------------------------------------------------------------------------------------------------------------------------------------------------------------------------------------------------------------------------------|----------------------------------------------------------------------------------|-----------------------------------------|----------------------------------------------------------------|---------------------------------------------------------------------------------|--|--|-----------|--|--|--|----------------------------------------------------------------------------------|--|--|---------------------------------------------------------------------------------|---|--------|------|----------------------------------------------|-----------------------------------------|----------------------------------------------------------------|--------------------------------------------------|---|-----------------------|--------|---|---|---|---|---|-------------------|--------|---|---|---|---|---|----------------------|--------|---|---|---|---|---|---------------------|--------|---|---|---|---|---|---------------------------|--------|---|---|---|---|---|-------------------|--------|---|---|---|---|---|--------------------|--------|---|---|---|---|---|----------------------|--------|---|---|---|---|---|------------------|--------|---|---|---|---|----|---------------------|--------|---|---|---|---|----|---------------------|--------|---|---|---|---|----|-------------------|--------|---|---|---|---|----|-------------------------|--------|---|---|---|---|----|----------------------|--------|---|---|---|---|----|-------------------------|--------|---|---|---|---|----|------------------------|--------|---|---|---|---|----|----------------------|--------|---|---|---|---|----|--------------------|--------|---|---|---|---|----|---------------------|--------|---|---|---|---|----|---------------------|--------|---|---|---|---|----|------------------------|--------|---|---|---|---|----|-----------------------|--------|---|---|---|---|----|------------------------|--------|---|---|---|---|-------|--|--|----|----|----|----|-------------|--|--|----|----|----|----|----|
|                         | 16b                       | Studies that might appear to meet the inclusion criteria were excluded because they did not have a specific age differentiation.                                                                                                                                                                                                                                                                                                                                                                                                                                                                                                                                                                                                                                                                                                                                                                                                                                                                                                                                                                                                                                                                                                                                                                                                                                                                                                                                                                                                                                                                                                                                                                                                                                                                                                                                                                                                                                                                                                                                                                                                                                                                                                                                                                                                                                                                                                                                                                                                                                                                                                                                                                                                                                                                                                                                                                                                                                                                                                                                                                                                                                                                                                                                                                                                                                            | 6-7                                                                              |                                         |                                                                |                                                                                 |  |  |           |  |  |  |                                                                                  |  |  |                                                                                 |   |        |      |                                              |                                         |                                                                |                                                  |   |                       |        |   |   |   |   |   |                   |        |   |   |   |   |   |                      |        |   |   |   |   |   |                     |        |   |   |   |   |   |                           |        |   |   |   |   |   |                   |        |   |   |   |   |   |                    |        |   |   |   |   |   |                      |        |   |   |   |   |   |                  |        |   |   |   |   |    |                     |        |   |   |   |   |    |                     |        |   |   |   |   |    |                   |        |   |   |   |   |    |                         |        |   |   |   |   |    |                      |        |   |   |   |   |    |                         |        |   |   |   |   |    |                        |        |   |   |   |   |    |                      |        |   |   |   |   |    |                    |        |   |   |   |   |    |                     |        |   |   |   |   |    |                     |        |   |   |   |   |    |                        |        |   |   |   |   |    |                       |        |   |   |   |   |    |                        |        |   |   |   |   |       |  |  |    |    |    |    |             |  |  |    |    |    |    |    |
| Study characteristics   | 17                        | <div>Cite each included study and present its characteristics.</div> <table><thead><tr><th></th><th></th><th></th><th colspan="3">CLUSTER 1</th><th>CLUSTER 2</th></tr><tr><th></th><th></th><th></th><th colspan="3">Improvements to access to housing and healthcare services and policy formulation</th><th>Unmet needs - social support, mental health, and finance and food insecurities.</th></tr><tr><th>#</th><th>Author</th><th>Date</th><th>TOPIC 1; +service, treatment, +include, care</th><th>TOPIC 3; plwh, home, +home, art, access</th><th>TOPIC 4; homelessness, hiv-related, +outcome, +associate, care</th><th>TOPIC 2; +uncertainty, +woman, +man, food, basic</th></tr></thead><tbody><tr><td>1</td><td>Furlotte et al., 2012</td><td>Mar-12</td><td>1</td><td>1</td><td>1</td><td>1</td></tr><tr><td>2</td><td>Lane et al., 2013</td><td>Jan-13</td><td>1</td><td>1</td><td>1</td><td>0</td></tr><tr><td>3</td><td>Solomon et al., 2014</td><td>Feb-14</td><td>1</td><td>0</td><td>1</td><td>1</td></tr><tr><td>4</td><td>Arnold et al., 2017</td><td>Jan-17</td><td>1</td><td>1</td><td>1</td><td>1</td></tr><tr><td>5</td><td>Cox and Brennan-Ing, 2017</td><td>Jan-17</td><td>1</td><td>1</td><td>1</td><td>1</td></tr><tr><td>6</td><td>Siou et al., 2017</td><td>May-17</td><td>1</td><td>1</td><td>1</td><td>0</td></tr><tr><td>7</td><td>Tobin et al., 2018</td><td>Jan-18</td><td>1</td><td>1</td><td>0</td><td>1</td></tr><tr><td>8</td><td>Solomon et al., 2018</td><td>Apr-18</td><td>1</td><td>1</td><td>1</td><td>1</td></tr><tr><td>9</td><td>Sok et al., 2018</td><td>May-18</td><td>0</td><td>0</td><td>1</td><td>1</td></tr><tr><td>10</td><td>Nguyen et al., 2019</td><td>Feb-19</td><td>1</td><td>0</td><td>1</td><td>1</td></tr><tr><td>11</td><td>Baguso et al., 2019</td><td>Apr-19</td><td>1</td><td>1</td><td>1</td><td>1</td></tr><tr><td>12</td><td>Olivien-Mui, 2019</td><td>May-19</td><td>1</td><td>1</td><td>0</td><td>1</td></tr><tr><td>13</td><td>Justice and Akgün, 2019</td><td>Jul-19</td><td>1</td><td>1</td><td>1</td><td>1</td></tr><tr><td>14</td><td>Whittle et al., 2020</td><td>Jan-20</td><td>0</td><td>0</td><td>1</td><td>1</td></tr><tr><td>15</td><td>Wainwright et al., 2020</td><td>Jun-20</td><td>1</td><td>1</td><td>1</td><td>1</td></tr><tr><td>16</td><td>Yoo-Jeong et al., 2020</td><td>Jul-20</td><td>1</td><td>0</td><td>1</td><td>1</td></tr><tr><td>17</td><td>Chayama et al., 2020</td><td>Aug-20</td><td>1</td><td>1</td><td>0</td><td>0</td></tr><tr><td>18</td><td>Koehn et al., 2021</td><td>Jan-21</td><td>1</td><td>1</td><td>0</td><td>1</td></tr><tr><td>19</td><td>Cherry et al., 2021</td><td>Jun-21</td><td>1</td><td>0</td><td>1</td><td>1</td></tr><tr><td>20</td><td>Murzin et al., 2022</td><td>Sep-22</td><td>1</td><td>1</td><td>1</td><td>1</td></tr><tr><td>21</td><td>Vorobyova et al., 2022</td><td>Oct-22</td><td>1</td><td>0</td><td>1</td><td>1</td></tr><tr><td>22</td><td>Mitchell et al., 2023</td><td>Feb-23</td><td>1</td><td>0</td><td>1</td><td>1</td></tr><tr><td>23</td><td>Weinstein et al., 2023</td><td>Mar-23</td><td>1</td><td>1</td><td>1</td><td>1</td></tr><tr><td colspan="3">Total</td><td>21</td><td>15</td><td>19</td><td>20</td></tr><tr><td colspan="3">Frequency %</td><td>91</td><td>65</td><td>83</td><td>87</td></tr></tbody></table> |                                                                                  |                                         |                                                                | CLUSTER 1                                                                       |  |  | CLUSTER 2 |  |  |  | Improvements to access to housing and healthcare services and policy formulation |  |  | Unmet needs - social support, mental health, and finance and food insecurities. | # | Author | Date | TOPIC 1; +service, treatment, +include, care | TOPIC 3; plwh, home, +home, art, access | TOPIC 4; homelessness, hiv-related, +outcome, +associate, care | TOPIC 2; +uncertainty, +woman, +man, food, basic | 1 | Furlotte et al., 2012 | Mar-12 | 1 | 1 | 1 | 1 | 2 | Lane et al., 2013 | Jan-13 | 1 | 1 | 1 | 0 | 3 | Solomon et al., 2014 | Feb-14 | 1 | 0 | 1 | 1 | 4 | Arnold et al., 2017 | Jan-17 | 1 | 1 | 1 | 1 | 5 | Cox and Brennan-Ing, 2017 | Jan-17 | 1 | 1 | 1 | 1 | 6 | Siou et al., 2017 | May-17 | 1 | 1 | 1 | 0 | 7 | Tobin et al., 2018 | Jan-18 | 1 | 1 | 0 | 1 | 8 | Solomon et al., 2018 | Apr-18 | 1 | 1 | 1 | 1 | 9 | Sok et al., 2018 | May-18 | 0 | 0 | 1 | 1 | 10 | Nguyen et al., 2019 | Feb-19 | 1 | 0 | 1 | 1 | 11 | Baguso et al., 2019 | Apr-19 | 1 | 1 | 1 | 1 | 12 | Olivien-Mui, 2019 | May-19 | 1 | 1 | 0 | 1 | 13 | Justice and Akgün, 2019 | Jul-19 | 1 | 1 | 1 | 1 | 14 | Whittle et al., 2020 | Jan-20 | 0 | 0 | 1 | 1 | 15 | Wainwright et al., 2020 | Jun-20 | 1 | 1 | 1 | 1 | 16 | Yoo-Jeong et al., 2020 | Jul-20 | 1 | 0 | 1 | 1 | 17 | Chayama et al., 2020 | Aug-20 | 1 | 1 | 0 | 0 | 18 | Koehn et al., 2021 | Jan-21 | 1 | 1 | 0 | 1 | 19 | Cherry et al., 2021 | Jun-21 | 1 | 0 | 1 | 1 | 20 | Murzin et al., 2022 | Sep-22 | 1 | 1 | 1 | 1 | 21 | Vorobyova et al., 2022 | Oct-22 | 1 | 0 | 1 | 1 | 22 | Mitchell et al., 2023 | Feb-23 | 1 | 0 | 1 | 1 | 23 | Weinstein et al., 2023 | Mar-23 | 1 | 1 | 1 | 1 | Total |  |  | 21 | 15 | 19 | 20 | Frequency % |  |  | 91 | 65 | 83 | 87 | 12 |
|                         |                           |                                                                                                                                                                                                                                                                                                                                                                                                                                                                                                                                                                                                                                                                                                                                                                                                                                                                                                                                                                                                                                                                                                                                                                                                                                                                                                                                                                                                                                                                                                                                                                                                                                                                                                                                                                                                                                                                                                                                                                                                                                                                                                                                                                                                                                                                                                                                                                                                                                                                                                                                                                                                                                                                                                                                                                                                                                                                                                                                                                                                                                                                                                                                                                                                                                                                                                                                                                             | CLUSTER 1                                                                        |                                         |                                                                | CLUSTER 2                                                                       |  |  |           |  |  |  |                                                                                  |  |  |                                                                                 |   |        |      |                                              |                                         |                                                                |                                                  |   |                       |        |   |   |   |   |   |                   |        |   |   |   |   |   |                      |        |   |   |   |   |   |                     |        |   |   |   |   |   |                           |        |   |   |   |   |   |                   |        |   |   |   |   |   |                    |        |   |   |   |   |   |                      |        |   |   |   |   |   |                  |        |   |   |   |   |    |                     |        |   |   |   |   |    |                     |        |   |   |   |   |    |                   |        |   |   |   |   |    |                         |        |   |   |   |   |    |                      |        |   |   |   |   |    |                         |        |   |   |   |   |    |                        |        |   |   |   |   |    |                      |        |   |   |   |   |    |                    |        |   |   |   |   |    |                     |        |   |   |   |   |    |                     |        |   |   |   |   |    |                        |        |   |   |   |   |    |                       |        |   |   |   |   |    |                        |        |   |   |   |   |       |  |  |    |    |    |    |             |  |  |    |    |    |    |    |
|                         |                           |                                                                                                                                                                                                                                                                                                                                                                                                                                                                                                                                                                                                                                                                                                                                                                                                                                                                                                                                                                                                                                                                                                                                                                                                                                                                                                                                                                                                                                                                                                                                                                                                                                                                                                                                                                                                                                                                                                                                                                                                                                                                                                                                                                                                                                                                                                                                                                                                                                                                                                                                                                                                                                                                                                                                                                                                                                                                                                                                                                                                                                                                                                                                                                                                                                                                                                                                                                             | Improvements to access to housing and healthcare services and policy formulation |                                         |                                                                | Unmet needs - social support, mental health, and finance and food insecurities. |  |  |           |  |  |  |                                                                                  |  |  |                                                                                 |   |        |      |                                              |                                         |                                                                |                                                  |   |                       |        |   |   |   |   |   |                   |        |   |   |   |   |   |                      |        |   |   |   |   |   |                     |        |   |   |   |   |   |                           |        |   |   |   |   |   |                   |        |   |   |   |   |   |                    |        |   |   |   |   |   |                      |        |   |   |   |   |   |                  |        |   |   |   |   |    |                     |        |   |   |   |   |    |                     |        |   |   |   |   |    |                   |        |   |   |   |   |    |                         |        |   |   |   |   |    |                      |        |   |   |   |   |    |                         |        |   |   |   |   |    |                        |        |   |   |   |   |    |                      |        |   |   |   |   |    |                    |        |   |   |   |   |    |                     |        |   |   |   |   |    |                     |        |   |   |   |   |    |                        |        |   |   |   |   |    |                       |        |   |   |   |   |    |                        |        |   |   |   |   |       |  |  |    |    |    |    |             |  |  |    |    |    |    |    |
| #                       | Author                    | Date                                                                                                                                                                                                                                                                                                                                                                                                                                                                                                                                                                                                                                                                                                                                                                                                                                                                                                                                                                                                                                                                                                                                                                                                                                                                                                                                                                                                                                                                                                                                                                                                                                                                                                                                                                                                                                                                                                                                                                                                                                                                                                                                                                                                                                                                                                                                                                                                                                                                                                                                                                                                                                                                                                                                                                                                                                                                                                                                                                                                                                                                                                                                                                                                                                                                                                                                                                        | TOPIC 1; +service, treatment, +include, care                                     | TOPIC 3; plwh, home, +home, art, access | TOPIC 4; homelessness, hiv-related, +outcome, +associate, care | TOPIC 2; +uncertainty, +woman, +man, food, basic                                |  |  |           |  |  |  |                                                                                  |  |  |                                                                                 |   |        |      |                                              |                                         |                                                                |                                                  |   |                       |        |   |   |   |   |   |                   |        |   |   |   |   |   |                      |        |   |   |   |   |   |                     |        |   |   |   |   |   |                           |        |   |   |   |   |   |                   |        |   |   |   |   |   |                    |        |   |   |   |   |   |                      |        |   |   |   |   |   |                  |        |   |   |   |   |    |                     |        |   |   |   |   |    |                     |        |   |   |   |   |    |                   |        |   |   |   |   |    |                         |        |   |   |   |   |    |                      |        |   |   |   |   |    |                         |        |   |   |   |   |    |                        |        |   |   |   |   |    |                      |        |   |   |   |   |    |                    |        |   |   |   |   |    |                     |        |   |   |   |   |    |                     |        |   |   |   |   |    |                        |        |   |   |   |   |    |                       |        |   |   |   |   |    |                        |        |   |   |   |   |       |  |  |    |    |    |    |             |  |  |    |    |    |    |    |
| 1                       | Furlotte et al., 2012     | Mar-12                                                                                                                                                                                                                                                                                                                                                                                                                                                                                                                                                                                                                                                                                                                                                                                                                                                                                                                                                                                                                                                                                                                                                                                                                                                                                                                                                                                                                                                                                                                                                                                                                                                                                                                                                                                                                                                                                                                                                                                                                                                                                                                                                                                                                                                                                                                                                                                                                                                                                                                                                                                                                                                                                                                                                                                                                                                                                                                                                                                                                                                                                                                                                                                                                                                                                                                                                                      | 1                                                                                | 1                                       | 1                                                              | 1                                                                               |  |  |           |  |  |  |                                                                                  |  |  |                                                                                 |   |        |      |                                              |                                         |                                                                |                                                  |   |                       |        |   |   |   |   |   |                   |        |   |   |   |   |   |                      |        |   |   |   |   |   |                     |        |   |   |   |   |   |                           |        |   |   |   |   |   |                   |        |   |   |   |   |   |                    |        |   |   |   |   |   |                      |        |   |   |   |   |   |                  |        |   |   |   |   |    |                     |        |   |   |   |   |    |                     |        |   |   |   |   |    |                   |        |   |   |   |   |    |                         |        |   |   |   |   |    |                      |        |   |   |   |   |    |                         |        |   |   |   |   |    |                        |        |   |   |   |   |    |                      |        |   |   |   |   |    |                    |        |   |   |   |   |    |                     |        |   |   |   |   |    |                     |        |   |   |   |   |    |                        |        |   |   |   |   |    |                       |        |   |   |   |   |    |                        |        |   |   |   |   |       |  |  |    |    |    |    |             |  |  |    |    |    |    |    |
| 2                       | Lane et al., 2013         | Jan-13                                                                                                                                                                                                                                                                                                                                                                                                                                                                                                                                                                                                                                                                                                                                                                                                                                                                                                                                                                                                                                                                                                                                                                                                                                                                                                                                                                                                                                                                                                                                                                                                                                                                                                                                                                                                                                                                                                                                                                                                                                                                                                                                                                                                                                                                                                                                                                                                                                                                                                                                                                                                                                                                                                                                                                                                                                                                                                                                                                                                                                                                                                                                                                                                                                                                                                                                                                      | 1                                                                                | 1                                       | 1                                                              | 0                                                                               |  |  |           |  |  |  |                                                                                  |  |  |                                                                                 |   |        |      |                                              |                                         |                                                                |                                                  |   |                       |        |   |   |   |   |   |                   |        |   |   |   |   |   |                      |        |   |   |   |   |   |                     |        |   |   |   |   |   |                           |        |   |   |   |   |   |                   |        |   |   |   |   |   |                    |        |   |   |   |   |   |                      |        |   |   |   |   |   |                  |        |   |   |   |   |    |                     |        |   |   |   |   |    |                     |        |   |   |   |   |    |                   |        |   |   |   |   |    |                         |        |   |   |   |   |    |                      |        |   |   |   |   |    |                         |        |   |   |   |   |    |                        |        |   |   |   |   |    |                      |        |   |   |   |   |    |                    |        |   |   |   |   |    |                     |        |   |   |   |   |    |                     |        |   |   |   |   |    |                        |        |   |   |   |   |    |                       |        |   |   |   |   |    |                        |        |   |   |   |   |       |  |  |    |    |    |    |             |  |  |    |    |    |    |    |
| 3                       | Solomon et al., 2014      | Feb-14                                                                                                                                                                                                                                                                                                                                                                                                                                                                                                                                                                                                                                                                                                                                                                                                                                                                                                                                                                                                                                                                                                                                                                                                                                                                                                                                                                                                                                                                                                                                                                                                                                                                                                                                                                                                                                                                                                                                                                                                                                                                                                                                                                                                                                                                                                                                                                                                                                                                                                                                                                                                                                                                                                                                                                                                                                                                                                                                                                                                                                                                                                                                                                                                                                                                                                                                                                      | 1                                                                                | 0                                       | 1                                                              | 1                                                                               |  |  |           |  |  |  |                                                                                  |  |  |                                                                                 |   |        |      |                                              |                                         |                                                                |                                                  |   |                       |        |   |   |   |   |   |                   |        |   |   |   |   |   |                      |        |   |   |   |   |   |                     |        |   |   |   |   |   |                           |        |   |   |   |   |   |                   |        |   |   |   |   |   |                    |        |   |   |   |   |   |                      |        |   |   |   |   |   |                  |        |   |   |   |   |    |                     |        |   |   |   |   |    |                     |        |   |   |   |   |    |                   |        |   |   |   |   |    |                         |        |   |   |   |   |    |                      |        |   |   |   |   |    |                         |        |   |   |   |   |    |                        |        |   |   |   |   |    |                      |        |   |   |   |   |    |                    |        |   |   |   |   |    |                     |        |   |   |   |   |    |                     |        |   |   |   |   |    |                        |        |   |   |   |   |    |                       |        |   |   |   |   |    |                        |        |   |   |   |   |       |  |  |    |    |    |    |             |  |  |    |    |    |    |    |
| 4                       | Arnold et al., 2017       | Jan-17                                                                                                                                                                                                                                                                                                                                                                                                                                                                                                                                                                                                                                                                                                                                                                                                                                                                                                                                                                                                                                                                                                                                                                                                                                                                                                                                                                                                                                                                                                                                                                                                                                                                                                                                                                                                                                                                                                                                                                                                                                                                                                                                                                                                                                                                                                                                                                                                                                                                                                                                                                                                                                                                                                                                                                                                                                                                                                                                                                                                                                                                                                                                                                                                                                                                                                                                                                      | 1                                                                                | 1                                       | 1                                                              | 1                                                                               |  |  |           |  |  |  |                                                                                  |  |  |                                                                                 |   |        |      |                                              |                                         |                                                                |                                                  |   |                       |        |   |   |   |   |   |                   |        |   |   |   |   |   |                      |        |   |   |   |   |   |                     |        |   |   |   |   |   |                           |        |   |   |   |   |   |                   |        |   |   |   |   |   |                    |        |   |   |   |   |   |                      |        |   |   |   |   |   |                  |        |   |   |   |   |    |                     |        |   |   |   |   |    |                     |        |   |   |   |   |    |                   |        |   |   |   |   |    |                         |        |   |   |   |   |    |                      |        |   |   |   |   |    |                         |        |   |   |   |   |    |                        |        |   |   |   |   |    |                      |        |   |   |   |   |    |                    |        |   |   |   |   |    |                     |        |   |   |   |   |    |                     |        |   |   |   |   |    |                        |        |   |   |   |   |    |                       |        |   |   |   |   |    |                        |        |   |   |   |   |       |  |  |    |    |    |    |             |  |  |    |    |    |    |    |
| 5                       | Cox and Brennan-Ing, 2017 | Jan-17                                                                                                                                                                                                                                                                                                                                                                                                                                                                                                                                                                                                                                                                                                                                                                                                                                                                                                                                                                                                                                                                                                                                                                                                                                                                                                                                                                                                                                                                                                                                                                                                                                                                                                                                                                                                                                                                                                                                                                                                                                                                                                                                                                                                                                                                                                                                                                                                                                                                                                                                                                                                                                                                                                                                                                                                                                                                                                                                                                                                                                                                                                                                                                                                                                                                                                                                                                      | 1                                                                                | 1                                       | 1                                                              | 1                                                                               |  |  |           |  |  |  |                                                                                  |  |  |                                                                                 |   |        |      |                                              |                                         |                                                                |                                                  |   |                       |        |   |   |   |   |   |                   |        |   |   |   |   |   |                      |        |   |   |   |   |   |                     |        |   |   |   |   |   |                           |        |   |   |   |   |   |                   |        |   |   |   |   |   |                    |        |   |   |   |   |   |                      |        |   |   |   |   |   |                  |        |   |   |   |   |    |                     |        |   |   |   |   |    |                     |        |   |   |   |   |    |                   |        |   |   |   |   |    |                         |        |   |   |   |   |    |                      |        |   |   |   |   |    |                         |        |   |   |   |   |    |                        |        |   |   |   |   |    |                      |        |   |   |   |   |    |                    |        |   |   |   |   |    |                     |        |   |   |   |   |    |                     |        |   |   |   |   |    |                        |        |   |   |   |   |    |                       |        |   |   |   |   |    |                        |        |   |   |   |   |       |  |  |    |    |    |    |             |  |  |    |    |    |    |    |
| 6                       | Siou et al., 2017         | May-17                                                                                                                                                                                                                                                                                                                                                                                                                                                                                                                                                                                                                                                                                                                                                                                                                                                                                                                                                                                                                                                                                                                                                                                                                                                                                                                                                                                                                                                                                                                                                                                                                                                                                                                                                                                                                                                                                                                                                                                                                                                                                                                                                                                                                                                                                                                                                                                                                                                                                                                                                                                                                                                                                                                                                                                                                                                                                                                                                                                                                                                                                                                                                                                                                                                                                                                                                                      | 1                                                                                | 1                                       | 1                                                              | 0                                                                               |  |  |           |  |  |  |                                                                                  |  |  |                                                                                 |   |        |      |                                              |                                         |                                                                |                                                  |   |                       |        |   |   |   |   |   |                   |        |   |   |   |   |   |                      |        |   |   |   |   |   |                     |        |   |   |   |   |   |                           |        |   |   |   |   |   |                   |        |   |   |   |   |   |                    |        |   |   |   |   |   |                      |        |   |   |   |   |   |                  |        |   |   |   |   |    |                     |        |   |   |   |   |    |                     |        |   |   |   |   |    |                   |        |   |   |   |   |    |                         |        |   |   |   |   |    |                      |        |   |   |   |   |    |                         |        |   |   |   |   |    |                        |        |   |   |   |   |    |                      |        |   |   |   |   |    |                    |        |   |   |   |   |    |                     |        |   |   |   |   |    |                     |        |   |   |   |   |    |                        |        |   |   |   |   |    |                       |        |   |   |   |   |    |                        |        |   |   |   |   |       |  |  |    |    |    |    |             |  |  |    |    |    |    |    |
| 7                       | Tobin et al., 2018        | Jan-18                                                                                                                                                                                                                                                                                                                                                                                                                                                                                                                                                                                                                                                                                                                                                                                                                                                                                                                                                                                                                                                                                                                                                                                                                                                                                                                                                                                                                                                                                                                                                                                                                                                                                                                                                                                                                                                                                                                                                                                                                                                                                                                                                                                                                                                                                                                                                                                                                                                                                                                                                                                                                                                                                                                                                                                                                                                                                                                                                                                                                                                                                                                                                                                                                                                                                                                                                                      | 1                                                                                | 1                                       | 0                                                              | 1                                                                               |  |  |           |  |  |  |                                                                                  |  |  |                                                                                 |   |        |      |                                              |                                         |                                                                |                                                  |   |                       |        |   |   |   |   |   |                   |        |   |   |   |   |   |                      |        |   |   |   |   |   |                     |        |   |   |   |   |   |                           |        |   |   |   |   |   |                   |        |   |   |   |   |   |                    |        |   |   |   |   |   |                      |        |   |   |   |   |   |                  |        |   |   |   |   |    |                     |        |   |   |   |   |    |                     |        |   |   |   |   |    |                   |        |   |   |   |   |    |                         |        |   |   |   |   |    |                      |        |   |   |   |   |    |                         |        |   |   |   |   |    |                        |        |   |   |   |   |    |                      |        |   |   |   |   |    |                    |        |   |   |   |   |    |                     |        |   |   |   |   |    |                     |        |   |   |   |   |    |                        |        |   |   |   |   |    |                       |        |   |   |   |   |    |                        |        |   |   |   |   |       |  |  |    |    |    |    |             |  |  |    |    |    |    |    |
| 8                       | Solomon et al., 2018      | Apr-18                                                                                                                                                                                                                                                                                                                                                                                                                                                                                                                                                                                                                                                                                                                                                                                                                                                                                                                                                                                                                                                                                                                                                                                                                                                                                                                                                                                                                                                                                                                                                                                                                                                                                                                                                                                                                                                                                                                                                                                                                                                                                                                                                                                                                                                                                                                                                                                                                                                                                                                                                                                                                                                                                                                                                                                                                                                                                                                                                                                                                                                                                                                                                                                                                                                                                                                                                                      | 1                                                                                | 1                                       | 1                                                              | 1                                                                               |  |  |           |  |  |  |                                                                                  |  |  |                                                                                 |   |        |      |                                              |                                         |                                                                |                                                  |   |                       |        |   |   |   |   |   |                   |        |   |   |   |   |   |                      |        |   |   |   |   |   |                     |        |   |   |   |   |   |                           |        |   |   |   |   |   |                   |        |   |   |   |   |   |                    |        |   |   |   |   |   |                      |        |   |   |   |   |   |                  |        |   |   |   |   |    |                     |        |   |   |   |   |    |                     |        |   |   |   |   |    |                   |        |   |   |   |   |    |                         |        |   |   |   |   |    |                      |        |   |   |   |   |    |                         |        |   |   |   |   |    |                        |        |   |   |   |   |    |                      |        |   |   |   |   |    |                    |        |   |   |   |   |    |                     |        |   |   |   |   |    |                     |        |   |   |   |   |    |                        |        |   |   |   |   |    |                       |        |   |   |   |   |    |                        |        |   |   |   |   |       |  |  |    |    |    |    |             |  |  |    |    |    |    |    |
| 9                       | Sok et al., 2018          | May-18                                                                                                                                                                                                                                                                                                                                                                                                                                                                                                                                                                                                                                                                                                                                                                                                                                                                                                                                                                                                                                                                                                                                                                                                                                                                                                                                                                                                                                                                                                                                                                                                                                                                                                                                                                                                                                                                                                                                                                                                                                                                                                                                                                                                                                                                                                                                                                                                                                                                                                                                                                                                                                                                                                                                                                                                                                                                                                                                                                                                                                                                                                                                                                                                                                                                                                                                                                      | 0                                                                                | 0                                       | 1                                                              | 1                                                                               |  |  |           |  |  |  |                                                                                  |  |  |                                                                                 |   |        |      |                                              |                                         |                                                                |                                                  |   |                       |        |   |   |   |   |   |                   |        |   |   |   |   |   |                      |        |   |   |   |   |   |                     |        |   |   |   |   |   |                           |        |   |   |   |   |   |                   |        |   |   |   |   |   |                    |        |   |   |   |   |   |                      |        |   |   |   |   |   |                  |        |   |   |   |   |    |                     |        |   |   |   |   |    |                     |        |   |   |   |   |    |                   |        |   |   |   |   |    |                         |        |   |   |   |   |    |                      |        |   |   |   |   |    |                         |        |   |   |   |   |    |                        |        |   |   |   |   |    |                      |        |   |   |   |   |    |                    |        |   |   |   |   |    |                     |        |   |   |   |   |    |                     |        |   |   |   |   |    |                        |        |   |   |   |   |    |                       |        |   |   |   |   |    |                        |        |   |   |   |   |       |  |  |    |    |    |    |             |  |  |    |    |    |    |    |
| 10                      | Nguyen et al., 2019       | Feb-19                                                                                                                                                                                                                                                                                                                                                                                                                                                                                                                                                                                                                                                                                                                                                                                                                                                                                                                                                                                                                                                                                                                                                                                                                                                                                                                                                                                                                                                                                                                                                                                                                                                                                                                                                                                                                                                                                                                                                                                                                                                                                                                                                                                                                                                                                                                                                                                                                                                                                                                                                                                                                                                                                                                                                                                                                                                                                                                                                                                                                                                                                                                                                                                                                                                                                                                                                                      | 1                                                                                | 0                                       | 1                                                              | 1                                                                               |  |  |           |  |  |  |                                                                                  |  |  |                                                                                 |   |        |      |                                              |                                         |                                                                |                                                  |   |                       |        |   |   |   |   |   |                   |        |   |   |   |   |   |                      |        |   |   |   |   |   |                     |        |   |   |   |   |   |                           |        |   |   |   |   |   |                   |        |   |   |   |   |   |                    |        |   |   |   |   |   |                      |        |   |   |   |   |   |                  |        |   |   |   |   |    |                     |        |   |   |   |   |    |                     |        |   |   |   |   |    |                   |        |   |   |   |   |    |                         |        |   |   |   |   |    |                      |        |   |   |   |   |    |                         |        |   |   |   |   |    |                        |        |   |   |   |   |    |                      |        |   |   |   |   |    |                    |        |   |   |   |   |    |                     |        |   |   |   |   |    |                     |        |   |   |   |   |    |                        |        |   |   |   |   |    |                       |        |   |   |   |   |    |                        |        |   |   |   |   |       |  |  |    |    |    |    |             |  |  |    |    |    |    |    |
| 11                      | Baguso et al., 2019       | Apr-19                                                                                                                                                                                                                                                                                                                                                                                                                                                                                                                                                                                                                                                                                                                                                                                                                                                                                                                                                                                                                                                                                                                                                                                                                                                                                                                                                                                                                                                                                                                                                                                                                                                                                                                                                                                                                                                                                                                                                                                                                                                                                                                                                                                                                                                                                                                                                                                                                                                                                                                                                                                                                                                                                                                                                                                                                                                                                                                                                                                                                                                                                                                                                                                                                                                                                                                                                                      | 1                                                                                | 1                                       | 1                                                              | 1                                                                               |  |  |           |  |  |  |                                                                                  |  |  |                                                                                 |   |        |      |                                              |                                         |                                                                |                                                  |   |                       |        |   |   |   |   |   |                   |        |   |   |   |   |   |                      |        |   |   |   |   |   |                     |        |   |   |   |   |   |                           |        |   |   |   |   |   |                   |        |   |   |   |   |   |                    |        |   |   |   |   |   |                      |        |   |   |   |   |   |                  |        |   |   |   |   |    |                     |        |   |   |   |   |    |                     |        |   |   |   |   |    |                   |        |   |   |   |   |    |                         |        |   |   |   |   |    |                      |        |   |   |   |   |    |                         |        |   |   |   |   |    |                        |        |   |   |   |   |    |                      |        |   |   |   |   |    |                    |        |   |   |   |   |    |                     |        |   |   |   |   |    |                     |        |   |   |   |   |    |                        |        |   |   |   |   |    |                       |        |   |   |   |   |    |                        |        |   |   |   |   |       |  |  |    |    |    |    |             |  |  |    |    |    |    |    |
| 12                      | Olivien-Mui, 2019         | May-19                                                                                                                                                                                                                                                                                                                                                                                                                                                                                                                                                                                                                                                                                                                                                                                                                                                                                                                                                                                                                                                                                                                                                                                                                                                                                                                                                                                                                                                                                                                                                                                                                                                                                                                                                                                                                                                                                                                                                                                                                                                                                                                                                                                                                                                                                                                                                                                                                                                                                                                                                                                                                                                                                                                                                                                                                                                                                                                                                                                                                                                                                                                                                                                                                                                                                                                                                                      | 1                                                                                | 1                                       | 0                                                              | 1                                                                               |  |  |           |  |  |  |                                                                                  |  |  |                                                                                 |   |        |      |                                              |                                         |                                                                |                                                  |   |                       |        |   |   |   |   |   |                   |        |   |   |   |   |   |                      |        |   |   |   |   |   |                     |        |   |   |   |   |   |                           |        |   |   |   |   |   |                   |        |   |   |   |   |   |                    |        |   |   |   |   |   |                      |        |   |   |   |   |   |                  |        |   |   |   |   |    |                     |        |   |   |   |   |    |                     |        |   |   |   |   |    |                   |        |   |   |   |   |    |                         |        |   |   |   |   |    |                      |        |   |   |   |   |    |                         |        |   |   |   |   |    |                        |        |   |   |   |   |    |                      |        |   |   |   |   |    |                    |        |   |   |   |   |    |                     |        |   |   |   |   |    |                     |        |   |   |   |   |    |                        |        |   |   |   |   |    |                       |        |   |   |   |   |    |                        |        |   |   |   |   |       |  |  |    |    |    |    |             |  |  |    |    |    |    |    |
| 13                      | Justice and Akgün, 2019   | Jul-19                                                                                                                                                                                                                                                                                                                                                                                                                                                                                                                                                                                                                                                                                                                                                                                                                                                                                                                                                                                                                                                                                                                                                                                                                                                                                                                                                                                                                                                                                                                                                                                                                                                                                                                                                                                                                                                                                                                                                                                                                                                                                                                                                                                                                                                                                                                                                                                                                                                                                                                                                                                                                                                                                                                                                                                                                                                                                                                                                                                                                                                                                                                                                                                                                                                                                                                                                                      | 1                                                                                | 1                                       | 1                                                              | 1                                                                               |  |  |           |  |  |  |                                                                                  |  |  |                                                                                 |   |        |      |                                              |                                         |                                                                |                                                  |   |                       |        |   |   |   |   |   |                   |        |   |   |   |   |   |                      |        |   |   |   |   |   |                     |        |   |   |   |   |   |                           |        |   |   |   |   |   |                   |        |   |   |   |   |   |                    |        |   |   |   |   |   |                      |        |   |   |   |   |   |                  |        |   |   |   |   |    |                     |        |   |   |   |   |    |                     |        |   |   |   |   |    |                   |        |   |   |   |   |    |                         |        |   |   |   |   |    |                      |        |   |   |   |   |    |                         |        |   |   |   |   |    |                        |        |   |   |   |   |    |                      |        |   |   |   |   |    |                    |        |   |   |   |   |    |                     |        |   |   |   |   |    |                     |        |   |   |   |   |    |                        |        |   |   |   |   |    |                       |        |   |   |   |   |    |                        |        |   |   |   |   |       |  |  |    |    |    |    |             |  |  |    |    |    |    |    |
| 14                      | Whittle et al., 2020      | Jan-20                                                                                                                                                                                                                                                                                                                                                                                                                                                                                                                                                                                                                                                                                                                                                                                                                                                                                                                                                                                                                                                                                                                                                                                                                                                                                                                                                                                                                                                                                                                                                                                                                                                                                                                                                                                                                                                                                                                                                                                                                                                                                                                                                                                                                                                                                                                                                                                                                                                                                                                                                                                                                                                                                                                                                                                                                                                                                                                                                                                                                                                                                                                                                                                                                                                                                                                                                                      | 0                                                                                | 0                                       | 1                                                              | 1                                                                               |  |  |           |  |  |  |                                                                                  |  |  |                                                                                 |   |        |      |                                              |                                         |                                                                |                                                  |   |                       |        |   |   |   |   |   |                   |        |   |   |   |   |   |                      |        |   |   |   |   |   |                     |        |   |   |   |   |   |                           |        |   |   |   |   |   |                   |        |   |   |   |   |   |                    |        |   |   |   |   |   |                      |        |   |   |   |   |   |                  |        |   |   |   |   |    |                     |        |   |   |   |   |    |                     |        |   |   |   |   |    |                   |        |   |   |   |   |    |                         |        |   |   |   |   |    |                      |        |   |   |   |   |    |                         |        |   |   |   |   |    |                        |        |   |   |   |   |    |                      |        |   |   |   |   |    |                    |        |   |   |   |   |    |                     |        |   |   |   |   |    |                     |        |   |   |   |   |    |                        |        |   |   |   |   |    |                       |        |   |   |   |   |    |                        |        |   |   |   |   |       |  |  |    |    |    |    |             |  |  |    |    |    |    |    |
| 15                      | Wainwright et al., 2020   | Jun-20                                                                                                                                                                                                                                                                                                                                                                                                                                                                                                                                                                                                                                                                                                                                                                                                                                                                                                                                                                                                                                                                                                                                                                                                                                                                                                                                                                                                                                                                                                                                                                                                                                                                                                                                                                                                                                                                                                                                                                                                                                                                                                                                                                                                                                                                                                                                                                                                                                                                                                                                                                                                                                                                                                                                                                                                                                                                                                                                                                                                                                                                                                                                                                                                                                                                                                                                                                      | 1                                                                                | 1                                       | 1                                                              | 1                                                                               |  |  |           |  |  |  |                                                                                  |  |  |                                                                                 |   |        |      |                                              |                                         |                                                                |                                                  |   |                       |        |   |   |   |   |   |                   |        |   |   |   |   |   |                      |        |   |   |   |   |   |                     |        |   |   |   |   |   |                           |        |   |   |   |   |   |                   |        |   |   |   |   |   |                    |        |   |   |   |   |   |                      |        |   |   |   |   |   |                  |        |   |   |   |   |    |                     |        |   |   |   |   |    |                     |        |   |   |   |   |    |                   |        |   |   |   |   |    |                         |        |   |   |   |   |    |                      |        |   |   |   |   |    |                         |        |   |   |   |   |    |                        |        |   |   |   |   |    |                      |        |   |   |   |   |    |                    |        |   |   |   |   |    |                     |        |   |   |   |   |    |                     |        |   |   |   |   |    |                        |        |   |   |   |   |    |                       |        |   |   |   |   |    |                        |        |   |   |   |   |       |  |  |    |    |    |    |             |  |  |    |    |    |    |    |
| 16                      | Yoo-Jeong et al., 2020    | Jul-20                                                                                                                                                                                                                                                                                                                                                                                                                                                                                                                                                                                                                                                                                                                                                                                                                                                                                                                                                                                                                                                                                                                                                                                                                                                                                                                                                                                                                                                                                                                                                                                                                                                                                                                                                                                                                                                                                                                                                                                                                                                                                                                                                                                                                                                                                                                                                                                                                                                                                                                                                                                                                                                                                                                                                                                                                                                                                                                                                                                                                                                                                                                                                                                                                                                                                                                                                                      | 1                                                                                | 0                                       | 1                                                              | 1                                                                               |  |  |           |  |  |  |                                                                                  |  |  |                                                                                 |   |        |      |                                              |                                         |                                                                |                                                  |   |                       |        |   |   |   |   |   |                   |        |   |   |   |   |   |                      |        |   |   |   |   |   |                     |        |   |   |   |   |   |                           |        |   |   |   |   |   |                   |        |   |   |   |   |   |                    |        |   |   |   |   |   |                      |        |   |   |   |   |   |                  |        |   |   |   |   |    |                     |        |   |   |   |   |    |                     |        |   |   |   |   |    |                   |        |   |   |   |   |    |                         |        |   |   |   |   |    |                      |        |   |   |   |   |    |                         |        |   |   |   |   |    |                        |        |   |   |   |   |    |                      |        |   |   |   |   |    |                    |        |   |   |   |   |    |                     |        |   |   |   |   |    |                     |        |   |   |   |   |    |                        |        |   |   |   |   |    |                       |        |   |   |   |   |    |                        |        |   |   |   |   |       |  |  |    |    |    |    |             |  |  |    |    |    |    |    |
| 17                      | Chayama et al., 2020      | Aug-20                                                                                                                                                                                                                                                                                                                                                                                                                                                                                                                                                                                                                                                                                                                                                                                                                                                                                                                                                                                                                                                                                                                                                                                                                                                                                                                                                                                                                                                                                                                                                                                                                                                                                                                                                                                                                                                                                                                                                                                                                                                                                                                                                                                                                                                                                                                                                                                                                                                                                                                                                                                                                                                                                                                                                                                                                                                                                                                                                                                                                                                                                                                                                                                                                                                                                                                                                                      | 1                                                                                | 1                                       | 0                                                              | 0                                                                               |  |  |           |  |  |  |                                                                                  |  |  |                                                                                 |   |        |      |                                              |                                         |                                                                |                                                  |   |                       |        |   |   |   |   |   |                   |        |   |   |   |   |   |                      |        |   |   |   |   |   |                     |        |   |   |   |   |   |                           |        |   |   |   |   |   |                   |        |   |   |   |   |   |                    |        |   |   |   |   |   |                      |        |   |   |   |   |   |                  |        |   |   |   |   |    |                     |        |   |   |   |   |    |                     |        |   |   |   |   |    |                   |        |   |   |   |   |    |                         |        |   |   |   |   |    |                      |        |   |   |   |   |    |                         |        |   |   |   |   |    |                        |        |   |   |   |   |    |                      |        |   |   |   |   |    |                    |        |   |   |   |   |    |                     |        |   |   |   |   |    |                     |        |   |   |   |   |    |                        |        |   |   |   |   |    |                       |        |   |   |   |   |    |                        |        |   |   |   |   |       |  |  |    |    |    |    |             |  |  |    |    |    |    |    |
| 18                      | Koehn et al., 2021        | Jan-21                                                                                                                                                                                                                                                                                                                                                                                                                                                                                                                                                                                                                                                                                                                                                                                                                                                                                                                                                                                                                                                                                                                                                                                                                                                                                                                                                                                                                                                                                                                                                                                                                                                                                                                                                                                                                                                                                                                                                                                                                                                                                                                                                                                                                                                                                                                                                                                                                                                                                                                                                                                                                                                                                                                                                                                                                                                                                                                                                                                                                                                                                                                                                                                                                                                                                                                                                                      | 1                                                                                | 1                                       | 0                                                              | 1                                                                               |  |  |           |  |  |  |                                                                                  |  |  |                                                                                 |   |        |      |                                              |                                         |                                                                |                                                  |   |                       |        |   |   |   |   |   |                   |        |   |   |   |   |   |                      |        |   |   |   |   |   |                     |        |   |   |   |   |   |                           |        |   |   |   |   |   |                   |        |   |   |   |   |   |                    |        |   |   |   |   |   |                      |        |   |   |   |   |   |                  |        |   |   |   |   |    |                     |        |   |   |   |   |    |                     |        |   |   |   |   |    |                   |        |   |   |   |   |    |                         |        |   |   |   |   |    |                      |        |   |   |   |   |    |                         |        |   |   |   |   |    |                        |        |   |   |   |   |    |                      |        |   |   |   |   |    |                    |        |   |   |   |   |    |                     |        |   |   |   |   |    |                     |        |   |   |   |   |    |                        |        |   |   |   |   |    |                       |        |   |   |   |   |    |                        |        |   |   |   |   |       |  |  |    |    |    |    |             |  |  |    |    |    |    |    |
| 19                      | Cherry et al., 2021       | Jun-21                                                                                                                                                                                                                                                                                                                                                                                                                                                                                                                                                                                                                                                                                                                                                                                                                                                                                                                                                                                                                                                                                                                                                                                                                                                                                                                                                                                                                                                                                                                                                                                                                                                                                                                                                                                                                                                                                                                                                                                                                                                                                                                                                                                                                                                                                                                                                                                                                                                                                                                                                                                                                                                                                                                                                                                                                                                                                                                                                                                                                                                                                                                                                                                                                                                                                                                                                                      | 1                                                                                | 0                                       | 1                                                              | 1                                                                               |  |  |           |  |  |  |                                                                                  |  |  |                                                                                 |   |        |      |                                              |                                         |                                                                |                                                  |   |                       |        |   |   |   |   |   |                   |        |   |   |   |   |   |                      |        |   |   |   |   |   |                     |        |   |   |   |   |   |                           |        |   |   |   |   |   |                   |        |   |   |   |   |   |                    |        |   |   |   |   |   |                      |        |   |   |   |   |   |                  |        |   |   |   |   |    |                     |        |   |   |   |   |    |                     |        |   |   |   |   |    |                   |        |   |   |   |   |    |                         |        |   |   |   |   |    |                      |        |   |   |   |   |    |                         |        |   |   |   |   |    |                        |        |   |   |   |   |    |                      |        |   |   |   |   |    |                    |        |   |   |   |   |    |                     |        |   |   |   |   |    |                     |        |   |   |   |   |    |                        |        |   |   |   |   |    |                       |        |   |   |   |   |    |                        |        |   |   |   |   |       |  |  |    |    |    |    |             |  |  |    |    |    |    |    |
| 20                      | Murzin et al., 2022       | Sep-22                                                                                                                                                                                                                                                                                                                                                                                                                                                                                                                                                                                                                                                                                                                                                                                                                                                                                                                                                                                                                                                                                                                                                                                                                                                                                                                                                                                                                                                                                                                                                                                                                                                                                                                                                                                                                                                                                                                                                                                                                                                                                                                                                                                                                                                                                                                                                                                                                                                                                                                                                                                                                                                                                                                                                                                                                                                                                                                                                                                                                                                                                                                                                                                                                                                                                                                                                                      | 1                                                                                | 1                                       | 1                                                              | 1                                                                               |  |  |           |  |  |  |                                                                                  |  |  |                                                                                 |   |        |      |                                              |                                         |                                                                |                                                  |   |                       |        |   |   |   |   |   |                   |        |   |   |   |   |   |                      |        |   |   |   |   |   |                     |        |   |   |   |   |   |                           |        |   |   |   |   |   |                   |        |   |   |   |   |   |                    |        |   |   |   |   |   |                      |        |   |   |   |   |   |                  |        |   |   |   |   |    |                     |        |   |   |   |   |    |                     |        |   |   |   |   |    |                   |        |   |   |   |   |    |                         |        |   |   |   |   |    |                      |        |   |   |   |   |    |                         |        |   |   |   |   |    |                        |        |   |   |   |   |    |                      |        |   |   |   |   |    |                    |        |   |   |   |   |    |                     |        |   |   |   |   |    |                     |        |   |   |   |   |    |                        |        |   |   |   |   |    |                       |        |   |   |   |   |    |                        |        |   |   |   |   |       |  |  |    |    |    |    |             |  |  |    |    |    |    |    |
| 21                      | Vorobyova et al., 2022    | Oct-22                                                                                                                                                                                                                                                                                                                                                                                                                                                                                                                                                                                                                                                                                                                                                                                                                                                                                                                                                                                                                                                                                                                                                                                                                                                                                                                                                                                                                                                                                                                                                                                                                                                                                                                                                                                                                                                                                                                                                                                                                                                                                                                                                                                                                                                                                                                                                                                                                                                                                                                                                                                                                                                                                                                                                                                                                                                                                                                                                                                                                                                                                                                                                                                                                                                                                                                                                                      | 1                                                                                | 0                                       | 1                                                              | 1                                                                               |  |  |           |  |  |  |                                                                                  |  |  |                                                                                 |   |        |      |                                              |                                         |                                                                |                                                  |   |                       |        |   |   |   |   |   |                   |        |   |   |   |   |   |                      |        |   |   |   |   |   |                     |        |   |   |   |   |   |                           |        |   |   |   |   |   |                   |        |   |   |   |   |   |                    |        |   |   |   |   |   |                      |        |   |   |   |   |   |                  |        |   |   |   |   |    |                     |        |   |   |   |   |    |                     |        |   |   |   |   |    |                   |        |   |   |   |   |    |                         |        |   |   |   |   |    |                      |        |   |   |   |   |    |                         |        |   |   |   |   |    |                        |        |   |   |   |   |    |                      |        |   |   |   |   |    |                    |        |   |   |   |   |    |                     |        |   |   |   |   |    |                     |        |   |   |   |   |    |                        |        |   |   |   |   |    |                       |        |   |   |   |   |    |                        |        |   |   |   |   |       |  |  |    |    |    |    |             |  |  |    |    |    |    |    |
| 22                      | Mitchell et al., 2023     | Feb-23                                                                                                                                                                                                                                                                                                                                                                                                                                                                                                                                                                                                                                                                                                                                                                                                                                                                                                                                                                                                                                                                                                                                                                                                                                                                                                                                                                                                                                                                                                                                                                                                                                                                                                                                                                                                                                                                                                                                                                                                                                                                                                                                                                                                                                                                                                                                                                                                                                                                                                                                                                                                                                                                                                                                                                                                                                                                                                                                                                                                                                                                                                                                                                                                                                                                                                                                                                      | 1                                                                                | 0                                       | 1                                                              | 1                                                                               |  |  |           |  |  |  |                                                                                  |  |  |                                                                                 |   |        |      |                                              |                                         |                                                                |                                                  |   |                       |        |   |   |   |   |   |                   |        |   |   |   |   |   |                      |        |   |   |   |   |   |                     |        |   |   |   |   |   |                           |        |   |   |   |   |   |                   |        |   |   |   |   |   |                    |        |   |   |   |   |   |                      |        |   |   |   |   |   |                  |        |   |   |   |   |    |                     |        |   |   |   |   |    |                     |        |   |   |   |   |    |                   |        |   |   |   |   |    |                         |        |   |   |   |   |    |                      |        |   |   |   |   |    |                         |        |   |   |   |   |    |                        |        |   |   |   |   |    |                      |        |   |   |   |   |    |                    |        |   |   |   |   |    |                     |        |   |   |   |   |    |                     |        |   |   |   |   |    |                        |        |   |   |   |   |    |                       |        |   |   |   |   |    |                        |        |   |   |   |   |       |  |  |    |    |    |    |             |  |  |    |    |    |    |    |
| 23                      | Weinstein et al., 2023    | Mar-23                                                                                                                                                                                                                                                                                                                                                                                                                                                                                                                                                                                                                                                                                                                                                                                                                                                                                                                                                                                                                                                                                                                                                                                                                                                                                                                                                                                                                                                                                                                                                                                                                                                                                                                                                                                                                                                                                                                                                                                                                                                                                                                                                                                                                                                                                                                                                                                                                                                                                                                                                                                                                                                                                                                                                                                                                                                                                                                                                                                                                                                                                                                                                                                                                                                                                                                                                                      | 1                                                                                | 1                                       | 1                                                              | 1                                                                               |  |  |           |  |  |  |                                                                                  |  |  |                                                                                 |   |        |      |                                              |                                         |                                                                |                                                  |   |                       |        |   |   |   |   |   |                   |        |   |   |   |   |   |                      |        |   |   |   |   |   |                     |        |   |   |   |   |   |                           |        |   |   |   |   |   |                   |        |   |   |   |   |   |                    |        |   |   |   |   |   |                      |        |   |   |   |   |   |                  |        |   |   |   |   |    |                     |        |   |   |   |   |    |                     |        |   |   |   |   |    |                   |        |   |   |   |   |    |                         |        |   |   |   |   |    |                      |        |   |   |   |   |    |                         |        |   |   |   |   |    |                        |        |   |   |   |   |    |                      |        |   |   |   |   |    |                    |        |   |   |   |   |    |                     |        |   |   |   |   |    |                     |        |   |   |   |   |    |                        |        |   |   |   |   |    |                       |        |   |   |   |   |    |                        |        |   |   |   |   |       |  |  |    |    |    |    |             |  |  |    |    |    |    |    |
| Total                   |                           |                                                                                                                                                                                                                                                                                                                                                                                                                                                                                                                                                                                                                                                                                                                                                                                                                                                                                                                                                                                                                                                                                                                                                                                                                                                                                                                                                                                                                                                                                                                                                                                                                                                                                                                                                                                                                                                                                                                                                                                                                                                                                                                                                                                                                                                                                                                                                                                                                                                                                                                                                                                                                                                                                                                                                                                                                                                                                                                                                                                                                                                                                                                                                                                                                                                                                                                                                                             | 21                                                                               | 15                                      | 19                                                             | 20                                                                              |  |  |           |  |  |  |                                                                                  |  |  |                                                                                 |   |        |      |                                              |                                         |                                                                |                                                  |   |                       |        |   |   |   |   |   |                   |        |   |   |   |   |   |                      |        |   |   |   |   |   |                     |        |   |   |   |   |   |                           |        |   |   |   |   |   |                   |        |   |   |   |   |   |                    |        |   |   |   |   |   |                      |        |   |   |   |   |   |                  |        |   |   |   |   |    |                     |        |   |   |   |   |    |                     |        |   |   |   |   |    |                   |        |   |   |   |   |    |                         |        |   |   |   |   |    |                      |        |   |   |   |   |    |                         |        |   |   |   |   |    |                        |        |   |   |   |   |    |                      |        |   |   |   |   |    |                    |        |   |   |   |   |    |                     |        |   |   |   |   |    |                     |        |   |   |   |   |    |                        |        |   |   |   |   |    |                       |        |   |   |   |   |    |                        |        |   |   |   |   |       |  |  |    |    |    |    |             |  |  |    |    |    |    |    |
| Frequency %             |                           |                                                                                                                                                                                                                                                                                                                                                                                                                                                                                                                                                                                                                                                                                                                                                                                                                                                                                                                                                                                                                                                                                                                                                                                                                                                                                                                                                                                                                                                                                                                                                                                                                                                                                                                                                                                                                                                                                                                                                                                                                                                                                                                                                                                                                                                                                                                                                                                                                                                                                                                                                                                                                                                                                                                                                                                                                                                                                                                                                                                                                                                                                                                                                                                                                                                                                                                                                                             | 91                                                                               | 65                                      | 83                                                             | 87                                                                              |  |  |           |  |  |  |                                                                                  |  |  |                                                                                 |   |        |      |                                              |                                         |                                                                |                                                  |   |                       |        |   |   |   |   |   |                   |        |   |   |   |   |   |                      |        |   |   |   |   |   |                     |        |   |   |   |   |   |                           |        |   |   |   |   |   |                   |        |   |   |   |   |   |                    |        |   |   |   |   |   |                      |        |   |   |   |   |   |                  |        |   |   |   |   |    |                     |        |   |   |   |   |    |                     |        |   |   |   |   |    |                   |        |   |   |   |   |    |                         |        |   |   |   |   |    |                      |        |   |   |   |   |    |                         |        |   |   |   |   |    |                        |        |   |   |   |   |    |                      |        |   |   |   |   |    |                    |        |   |   |   |   |    |                     |        |   |   |   |   |    |                     |        |   |   |   |   |    |                        |        |   |   |   |   |    |                       |        |   |   |   |   |    |                        |        |   |   |   |   |       |  |  |    |    |    |    |             |  |  |    |    |    |    |    |
| Risk of bias in studies | 18                        | n/a                                                                                                                                                                                                                                                                                                                                                                                                                                                                                                                                                                                                                                                                                                                                                                                                                                                                                                                                                                                                                                                                                                                                                                                                                                                                                                                                                                                                                                                                                                                                                                                                                                                                                                                                                                                                                                                                                                                                                                                                                                                                                                                                                                                                                                                                                                                                                                                                                                                                                                                                                                                                                                                                                                                                                                                                                                                                                                                                                                                                                                                                                                                                                                                                                                                                                                                                                                         | n/a                                                                              |                                         |                                                                |                                                                                 |  |  |           |  |  |  |                                                                                  |  |  |                                                                                 |   |        |      |                                              |                                         |                                                                |                                                  |   |                       |        |   |   |   |   |   |                   |        |   |   |   |   |   |                      |        |   |   |   |   |   |                     |        |   |   |   |   |   |                           |        |   |   |   |   |   |                   |        |   |   |   |   |   |                    |        |   |   |   |   |   |                      |        |   |   |   |   |   |                  |        |   |   |   |   |    |                     |        |   |   |   |   |    |                     |        |   |   |   |   |    |                   |        |   |   |   |   |    |                         |        |   |   |   |   |    |                      |        |   |   |   |   |    |                         |        |   |   |   |   |    |                        |        |   |   |   |   |    |                      |        |   |   |   |   |    |                    |        |   |   |   |   |    |                     |        |   |   |   |   |    |                     |        |   |   |   |   |    |                        |        |   |   |   |   |    |                       |        |   |   |   |   |    |                        |        |   |   |   |   |       |  |  |    |    |    |    |             |  |  |    |    |    |    |    |
| Results of              | 19                        | See step 17                                                                                                                                                                                                                                                                                                                                                                                                                                                                                                                                                                                                                                                                                                                                                                                                                                                                                                                                                                                                                                                                                                                                                                                                                                                                                                                                                                                                                                                                                                                                                                                                                                                                                                                                                                                                                                                                                                                                                                                                                                                                                                                                                                                                                                                                                                                                                                                                                                                                                                                                                                                                                                                                                                                                                                                                                                                                                                                                                                                                                                                                                                                                                                                                                                                                                                                                                                 | 12                                                                               |                                         |                                                                |                                                                                 |  |  |           |  |  |  |                                                                                  |  |  |                                                                                 |   |        |      |                                              |                                         |                                                                |                                                  |   |                       |        |   |   |   |   |   |                   |        |   |   |   |   |   |                      |        |   |   |   |   |   |                     |        |   |   |   |   |   |                           |        |   |   |   |   |   |                   |        |   |   |   |   |   |                    |        |   |   |   |   |   |                      |        |   |   |   |   |   |                  |        |   |   |   |   |    |                     |        |   |   |   |   |    |                     |        |   |   |   |   |    |                   |        |   |   |   |   |    |                         |        |   |   |   |   |    |                      |        |   |   |   |   |    |                         |        |   |   |   |   |    |                        |        |   |   |   |   |    |                      |        |   |   |   |   |    |                    |        |   |   |   |   |    |                     |        |   |   |   |   |    |                     |        |   |   |   |   |    |                        |        |   |   |   |   |    |                       |        |   |   |   |   |    |                        |        |   |   |   |   |       |  |  |    |    |    |    |             |  |  |    |    |    |    |    |



## PRISMA Checklist\_ Systematic Review: HIV, Aging, and Housing – North American Perspective 2012-2023

|                           | Item # | Checklist item                                                                                                                                                                                                                                                                                                                                                                                                                                                                                                                                                                                                                                                                                                                                                                                                | Page location where item is reported |
|---------------------------|--------|---------------------------------------------------------------------------------------------------------------------------------------------------------------------------------------------------------------------------------------------------------------------------------------------------------------------------------------------------------------------------------------------------------------------------------------------------------------------------------------------------------------------------------------------------------------------------------------------------------------------------------------------------------------------------------------------------------------------------------------------------------------------------------------------------------------|--------------------------------------|
| individual studies        |        |                                                                                                                                                                                                                                                                                                                                                                                                                                                                                                                                                                                                                                                                                                                                                                                                               |                                      |
| Results of syntheses      | 20a    | See step 17                                                                                                                                                                                                                                                                                                                                                                                                                                                                                                                                                                                                                                                                                                                                                                                                   | 12                                   |
|                           | 20b    | n/a                                                                                                                                                                                                                                                                                                                                                                                                                                                                                                                                                                                                                                                                                                                                                                                                           | n/a                                  |
|                           | 20c    | n/a                                                                                                                                                                                                                                                                                                                                                                                                                                                                                                                                                                                                                                                                                                                                                                                                           | n/a                                  |
|                           | 20d    | n/a                                                                                                                                                                                                                                                                                                                                                                                                                                                                                                                                                                                                                                                                                                                                                                                                           | n/a                                  |
| Reporting biases          | 21     | n/a                                                                                                                                                                                                                                                                                                                                                                                                                                                                                                                                                                                                                                                                                                                                                                                                           | n/a                                  |
| Certainty of evidence     | 22     | n/a                                                                                                                                                                                                                                                                                                                                                                                                                                                                                                                                                                                                                                                                                                                                                                                                           | n/a                                  |
| <b>DISCUSSION</b>         |        |                                                                                                                                                                                                                                                                                                                                                                                                                                                                                                                                                                                                                                                                                                                                                                                                               |                                      |
| Discussion                | 23a    | . The themes were identified and named based on LSA topic extraction, Topic ID. 1/Theme: Holistic care approach elements, Topic ID. 2/Theme: Insecurities – Food, financial, sexuality, and other basic needs, Topic ID/Theme; Access to housing and treatment/care, and Topic. 4/Theme: Homelessness and HIV-related outcomes. The two clusters were identified and named based on each cluster's main terms, representing the themes of the terms in those clusters. Cluster 1: Improvements to access housing and healthcare services and policies. Cluster 2: Unmet needs - social support, mental health, finance, food, and sexuality insecurities. These findings in our review had supporting articles within and outside our selected articles.                                                      | 8                                    |
|                           | 23b    | Only studies from the USA and Canada were selected; no study from other developed countries was considered. Because our gray literature searches were limited, we could have missed some insightful, pertinent, and educational articles based on empirical research reports inaccessible in commercially published literature.                                                                                                                                                                                                                                                                                                                                                                                                                                                                               | 16                                   |
|                           | 23c    | These may include risks of bias, such as selection bias. This study limited this by using and comparing review from independent reviewers.                                                                                                                                                                                                                                                                                                                                                                                                                                                                                                                                                                                                                                                                    | 6-7                                  |
|                           | 23d    | The study uses a systematic review and latent semantic analysis to identify emerging themes affecting older adults living with HIV. It focuses on holistic care approach, insecurities, housing and treatment access, homelessness, and HIV-related outcomes. Two significant themes emerge: improving policy and housing access and addressing unmet needs like social support, mental health, finance, food, and sexuality insecurities. The study recommends policies implementing a holistic care approach, significant healthcare investment, and accessible, equitable supportive services. Future research should focus on developing an instrument to measure unmet basic needs, reducing HIV-related stigma, and developing evidence-based care models that reflect care preferences for older adult | 16-17                                |
| <b>OTHER INFORMATION</b>  |        |                                                                                                                                                                                                                                                                                                                                                                                                                                                                                                                                                                                                                                                                                                                                                                                                               |                                      |
| Registration and protocol | 24a    | The review was not registered.                                                                                                                                                                                                                                                                                                                                                                                                                                                                                                                                                                                                                                                                                                                                                                                | n/a                                  |
|                           | 24b    | A protocol review was not prepared.                                                                                                                                                                                                                                                                                                                                                                                                                                                                                                                                                                                                                                                                                                                                                                           | n/a                                  |
|                           | 24c    | Describe and explain any amendments to information provided at registration or in the protocol.                                                                                                                                                                                                                                                                                                                                                                                                                                                                                                                                                                                                                                                                                                               | n/a                                  |
| Support                   | 25     | No financial or non-financial support for the review                                                                                                                                                                                                                                                                                                                                                                                                                                                                                                                                                                                                                                                                                                                                                          | n/a                                  |
| Competing interests       | 26     | The review authors have no competing interests.                                                                                                                                                                                                                                                                                                                                                                                                                                                                                                                                                                                                                                                                                                                                                               | n/a                                  |



## PRISMA Checklist\_ Systematic Review: HIV, Aging, and Housing – North American Perspective 2012-2023

|                                                | Item # | Checklist item                                            | Page location where item is reported |
|------------------------------------------------|--------|-----------------------------------------------------------|--------------------------------------|
| Availability of data, code and other materials | 27     | All resources used for this study are publicly available. | n/a                                  |

From: Page MJ, McKenzie JE, Bossuyt PM, Boutron I, Hoffmann TC, Mulrow CD, et al. The PRISMA 2020 statement: an updated guideline for reporting systematic reviews. BMJ 2021;372:n71. doi: 10.1136/bmj.n71  
For more information, visit: <http://www.prisma-statement.org/>

### Statement

This study used a systematic review (PRISMA) to provide a detailed, transparent investigation of previous research on the current knowledge of homelessness, housing access/insecurity/assistance/options, and the implications of housing on older PLWHA in North America. The process was documented as illustrated in the flow chart in maintaining transparency, integrity, and credibility of the PRISMA systematic review PRISMA systematic review (Page et al., 2021).
